# Supplementary material for: Statistical Modeling of Farmers’ Preference for Adaptation Strategies for Climate Change: The Case of Dera District, Oromia, Ethiopia
Source: Hindawi journal article supplement (doi:10.1155/2021/6659859), 2021-03-20
Supplement: f1 [file 6659859.f1.docx]

## Appendix 1 table 1: The Coding and Explanation of Variables in the Model

| Variable name | Description | Unit | Scale |
| --- | --- | --- | --- |
| Age | Ages of the heads of household | Years | Continuous |
| Sex | Gender of the heads of household | 1 = male  0 = female | Categorical |
| Sourcein | Source of information | 1 = media  2 = social groups  3 = do not get information | Categorical |
| Hhsize | Number of family member of household | Number | Continuous |
| Educleve | Education level of household head | 1 = no education  2 = primary  3 = secondary and above | Categorical |
| Sizeoffa | The size of the farm | Hectare | Continuous |
| ownershi | Tenure | 1 = owned  0 = otherwise | categorical |
| Gradeoff | Grade of farm | 1= A  2 = B  3 = C | Categorical |
| Agroecol | Agro ecological site of household | 1 = dega  2 = weinadega  3 = kola | Categorical |
| distance | Distance of the farm from output market | Km | Continuous |
| Distancb | Distance of the farm from input market | Km | continuous |
| distanc1 | Distance of farm from house of household | Km | Continuous |
| tlu | Tropical livestock unit | Number | Continuous |
| Farmerto | Farmer to farmer extension | 1= yes  0 = no | Categorical |
| Credit | Access to credit | 1 = yes  0 = no | Categorical |
| Irrigate | Access to irrigation facilities | 1 = yes  0 = no | Categorical |
| Extension | Access extension service | 1 = yes  0 = no | Categorical |
| Rainexp | Rainfall expectation | 0=not expect change  1 = expect change | Categorical |
| tempera0 | Temperature expectation | 0=not expect change  1 = expect change | Categorical |

Appendix 1 Table 2: Chi-square Test of association

| Chi-Square Tests | | | | |
| --- | --- | --- | --- | --- |
| Variables | Statistics | Value | df | P-value |
| Sex | Pearson Chi-Square | 6.219 | 4 | .169ns |
|  | | | | |
| Age | Pearson Chi-Square | 317.886 | 236 | .0001** |
|  | | | | |
| Source of Information | Pearson Chi-Square | 32.332 | 8 | .0001** |
|  |  |  |  |  |
| Household size | Pearson Chi-Square | 605.841 | 396 | .0001** |
|  | | | | |
| Education level | Pearson Chi-Square | 12.679 | 8 | .072ns |
|  | | | | |
| Distance sell | Pearson Chi-Square | 261.371 | 188 | .0001** |
|  | | | | |
| Distance buy | Pearson Chi-Square | 294.468 | 136 | .0001** |
|  | | | | |
| Agro-ecology | Pearson Chi-Square | 89.843 | 8 | .0001** |
|  | | | | |
| Tropical livestock unit | Pearson Chi-Square | 922.820 | 396 | .0001** |
|  | | | | |
| Size of farm | Pearson Chi-Square | 93.497 | 64 | .194ns |
|  | | | | |
| Grade of farm | Pearson Chi-Square | 22.082 | 8 | .005** |
|  | | | | |
| Distance of farm | Pearson Chi-Square | 252.679 | 208 | .019** |
|  | | | | |
| Extension service | Pearson Chi-Square | 27.142 | 4 | .0001** |
|  | | | | |
| Farmer to farmer extension | Pearson Chi-Square | 23.360 | 4 | .0001** |
|  |  |  |  |  |
| Credit service | Pearson Chi-Square | 6.366 | 4 | .173ns |
|  |  |  |  |  |
| Irrigation service | Pearson Chi-Square | 5.392 | 4 | .184ns |
|  |  |  |  |  |
| Rain expectation | Pearson Chi-Square | 31.417 | 4 | .0001** |
|  |  |  |  |  |
| Temperature expectation | Pearson Chi-Square | 22.239 | 4 | .0001** |

(** means significant at 1% level of significance, * means significant at 5% level of significance and ns means not significant at 5% level of significance)

Appendix 1 Table 3. Result of multinomial logistic regression using STATA 12

| Adaptati | Β | Std. Err. | z | P>z | Exp(β) | [95% Conf. Interval] of Exp(β) | |
| --- | --- | --- | --- | --- | --- | --- | --- |
| UDV |  |  |  |  |  |  |  |
| 1.Sex | 0.1490991 | 0.9274084 | 0.16 | 0.872ns | 1.160788 | 0.188513 | 7.147668 |
| Age | 0.152673 | 0.038231 | 3.99 | 0.0001** | 1.164943 | 1.080844 | 1.255587 |
| Sourcein |  |  |  |  |  |  |  |
| 1 | 1.548552 | 0.500484 | 3.09 | 0.002** | 4.704652 | 1.764065 | 12.54701 |
| 2 | 1.460027 | 0.61716 | 2.37 | 0.018* | 4.306078 | 1.28456 | 14.43475 |
| Hhsize | 1.424881 | 0.316192 | 4.51 | 0.0001** | 4.157364 | 2.237045 | 7.726117 |
| Educleve |  |  |  |  |  |  |  |
| 2 | -0.62031 | 0.79384 | -0.78 | 0.435ns | 0.537779 | 0.113471 | 2.548718 |
| 3 | -0.42742 | 0.706042 | -0.61 | 0.545ns | 0.652188 | 0.163451 | 2.602299 |
| Distance | -0.24903 | 0.059662 | -4.17 | 0.0001** | 0.779556 | 0.693526 | 0.876258 |
| Distancb | -0.20173 | 0.05517 | -3.66 | 0.0001** | 0.817313 | 0.733547 | 0.910645 |
| Agroecol |  |  |  |  |  |  |  |
| 1 | 1.256996 | 0.579803 | 2.17 | 0.030* | 3.514848 | 1.128176 | 10.95055 |
| 2 | 1.598038 | 0.591711 | 2.7 | 0.007** | 4.943324 | 1.550077 | 15.76467 |
| Tlu | 0.410236 | 0.095812 | 4.28 | 0.0001** | 1.507174 | 1.249131 | 1.818521 |
| Sizeoffa | 1.023436 | 0.233853 | 4.38 | 0.0001** | 2.782739 | 1.759609 | 4.40077 |
| 1.ownershi | 1.933404 | 0.463887 | 4.17 | 0.0001** | 6.913005 | 2.784873 | 17.16044 |
| Gradeoff |  |  |  |  |  |  |  |
| 2 | -3.55675 | 1.439167 | -2.47 | 0.013* | 0.028531 | 0.001699 | 0.47901 |
| 3 | -4.43557 | 1.454342 | -3.05 | 0.002** | 0.011848 | 0.000685 | 0.204925 |
| distanc1 | -0.29139 | 0.13547 | -2.15 | 0.031* | 0.747222 | 0.572978 | 0.974454 |
| 1.extensio | 1.904179 | 0.674832 | 2.82 | 0.005** | 6.713895 | 1.788779 | 25.19952 |
| 1.farmerto | 1.714692 | 0.445717 | 3.85 | 0.0001** | 5.554963 | 2.318922 | 13.30688 |
| 1.credit | 1.072843 | 0.786161 | 1.36 | 0.172ns | 2.92368 | 0.626251 | 13.64933 |
| 1.irrigati | 0.315328 | 0.864139 | 0.36 | 0.715ns | 1.370709 | 0.251993 | 7.455925 |
| 1.rainexp | 1.682882 | 0.433875 | 3.88 | 0.0001** | 5.381044 | 2.299067 | 12.59452 |
| 1.tempera0 | 1.689429 | 0.447076 | 3.78 | 0.0001** | 5.416389 | 2.255059 | 13.00954 |
| _cons | -2.56984 | 3.559228 | -0.72 | 0.470ns | 0.076548 | 7.15E-05 | 81.95061 |
| CPD |  |  |  | |  |  |  |
| 1.Sex | 0.1490991 | 0.9274084 | 0.16 | 0.872ns | 1.160788 | 0.188513 | 7.147668 |
| Age | 0.1133772 | 0.038396 | 2.95 | 0.003** | 1.120054 | 1.038859 | 1.207596 |
| Sourcein |  |  |  |  |  |  |  |
| 1 | 1.854731 | 0.590872 | 3.14 | 0.002** | 6.389979 | 2.007006 | 20.34465 |
| 2 | 1.392704 | 0.712018 | 1.96 | 0.048* | 4.02572 | 1.002179 | 16.25227 |
| Hhsize | 0.6100322 | 0.3258993 | 1.87 | 0.061ns | 1.840491 | 0.97169 | 3.486098 |
| Educleve |  |  |  |  |  |  |  |
| 2 | -1.317161 | 1.217212 | -1.08 | 0.279ns | 0.267895 | 0.024653 | 2.911097 |
| 3 | -1.487234 | 1.185528 | -1.25 | 0.210ns | 0.225997 | 0.02213 | 2.307948 |
| Distance | -0.1543269 | 0.0611669 | -2.52 | 0.012* | 0.856992 | 0.760171 | 0.966145 |
| Appendix 1 Table 3 (continued) | | | | | | | |
| Adaptati | Β | Std. Err. | z | P>z | Exp(β) | [95% Conf. Interval] of Exp(β) | |
| Distancb | -0.2308033 | 0.0585391 | -3.94 | 0.0001** | 0.793896 | 0.70784 | 0.890414 |
| Agroecol |  |  |  |  |  |  |  |
| 1 | 0.231757 | 0.07186 | 3.23 | 0.001** | 1.260814 | 1.095174 | 1.451505 |
| 2 | 0.161597 | 0.070352 | 2.3 | 0.022* | 1.175386 | 1.023993 | 1.349162 |
| Tlu | -0.0271736 | 0.1079761 | -0.25 | 0.80ns | 0.973192 | 0.78757 | 1.202564 |
| Sizeoffa | 1.029718 | 0.2371803 | 4.34 | 0.0001** | 2.800275 | 1.759189 | 4.457476 |
| 1.ownershi | 1.443119 | 0.824987 | 1.75 | 0.08ns | 0.177245 | 0.03265 | 0.962211 |
| Gradeoff |  |  |  |  |  |  |  |
| 2 | -3.509208 | 1.472035 | -2.38 | 0.017* | 0.029921 | 0.001671 | 0.535758 |
| 3 | -3.028981 | 1.46401 | -2.07 | 0.039* | 0.048365 | 0.002744 | 0.852507 |
| distanc1 | -0.3424419 | 0.1430935 | -2.39 | 0.017* | 0.710034 | 0.536387 | 0.939898 |
| 1.extensio | 1.998645 | 0.9202494 | 2.17 | 0.030* | 7.379049 | 1.215298 | 44.80413 |
| 1.farmerto | 1.535103 | 0.5203171 | 2.95 | 0.003** | 4.641805 | 1.674142 | 12.87009 |
| 1.credit | 0.8030045 | 0.8164438 | 0.98 | 0.325ns | 2.232238 | 0.450591 | 11.05856 |
| 1.irrigati | 0.9513129 | 0.8822055 | 1.08 | 0.281ns | 2.589107 | 0.459426 | 14.59099 |
| 1.rainexp | 1.669347 | 0.507567 | 3.29 | 0.001** | 5.308701 | 1.96312 | 14.35588 |
| 1.tempera0 | 1.809333 | 0.5354926 | 3.38 | 0.001** | 6.106371 | 2.13782 | 17.44196 |
| _cons | 0.0314508 | 3.63484 | 0.01 | 0.993ns | 1.031951 | 0.000831 | 1281.268 |
| PT |  |  |  |  |  |  |  |
| 1.Sex | -0.10493 | 0.874823 | -0.12 | 0.905ns | 0.900384 | 0.162098 | 5.00125 |
| Age | -0.0932701 | 0.0330535 | -2.82 | 0.005** | 0.910947 | 0.853804 | 0.971916 |
| Sourcein |  |  |  |  |  |  |  |
| 1 | 0.2368735 | 0.0516247 | 4.59 | 0.0001** | 1.267281 | 1.145328 | 1.402219 |
| 2 | 0.2442786 | 0.0541241 | 4.51 | 0.0001** | 1.2767 | 1.148202 | 1.419578 |
| Hhsize | 0.804559 | 0.2849466 | 2.82 | 0.005** | 2.23571 | 1.278994 | 3.908072 |
| Educleve |  |  |  |  |  |  |  |
| 2 | 1.599159 | 0.6828606 | 2.34 | 0.019* | 4.948868 | 1.297938 | 18.86939 |
| 3 | 0.4522748 | 0.6432996 | 0.7 | 0.482ns | 1.571884 | 0.445495 | 5.546232 |
| Distance | -0.0040989 | 0.0518178 | -0.08 | 0.937ns | 0.99591 | 0.899731 | 1.10237 |
| Distancb | -0.1280519 | 0.0486115 | -2.63 | 0.008** | 0.879808 | 0.799852 | 0.967756 |
| Agroecol |  |  |  |  |  |  |  |
| 1 | 1.330128 | 0.5071654 | 2.62 | 0.009** | 3.781526 | 1.399481 | 10.21803 |
| 2 | 1.926536 | 0.5028166 | 3.83 | 0.0001** | 6.865683 | 2.562628 | 18.39425 |
| Tlu | -0.030058 | 0.0893797 | -0.34 | 0.737ns | 0.970389 | 0.814453 | 1.156182 |
| Sizeoffa | 0.8735996 | 0.2159697 | 4.05 | 0.0001** | 2.395518 | 1.568793 | 3.657912 |
| 1.ownershi | 0.456369 | 0.720413 | 0.63 | 0.526ns | 4.233881 | 0.840444 | 21.32891 |
| Gradeoff |  |  |  |  |  |  |  |
| 2 | -2.524675 | 1.37026 | -1.84 | 0.065ns | 0.080084 | 0.00546 | 1.174666 |
| 3 | -2.338273 | 1.364393 | -1.71 | 0.087ns | 0.096494 | 0.006655 | 1.399182 |
| distanc1 | -0.2585616 | 0.1236853 | -2.09 | 0.037* | 0.772161 | 0.605936 | 0.983987 |
| 1.extensio | 2.014771 | 0.736324 | 2.74 | 0.006** | 7.499009 | 1.771103 | 31.75148 |
| Appendix 1 Table 3 (continued) | | | | | | | |
| Adaptati | Β | Std. Err. | z | P>z | Exp(β) | [95% Conf. Interval] of Exp(β) | |
| 1.farmerto | 1.973587 | 0.4331046 | 4.56 | 0.0001** | 7.196445 | 3.079348 | 16.81811 |
| 1.credit | 0.540792 | 0.6914817 | 0.78 | 0.434ns | 1.717366 | 0.442866 | 6.659678 |
| 1.irrigati | 0.0340182 | 0.7464694 | 0.05 | 0.964ns | 1.034603 | 0.23954 | 4.468583 |
| 1.rainexp | 2.050896 | 0.613446 | 3.34 | 0.001** | 7.774861 | 2.33629 | 25.87369 |
| 1.tempera0 | 1.619341 | 0.4314906 | 3.75 | 0.0001** | 5.049762 | 2.167631 | 11.76404 |
| _cons | 5.405522 | 3.210559 | 1.68 | 0.092ns | 222.6325 | 0.411866 | 120343.1 |
| SWC |  |  |  |  |  |  |  |
| 1.Sex | 0.017681 | 0.057166 | 0.31 | 0.757ns | 1.017838 | 0.909953 | 1.138514 |
| Age | -0.0022245 | 0.0367102 | -0.06 | 0.952ns | 0.997778 | 0.928509 | 1.072215 |
| Sourcein |  |  |  |  |  |  |  |
| 1 | 0.1614977 | 0.0509159 | 3.17 | 0.002** | 1.17527 | 1.063648 | 1.298606 |
| 2 | 0.1192 | 0.0529517 | 2.25 | 0.024* | 1.126595 | 1.015536 | 1.2498 |
| Hhsize | 0.217185 | 0.0467363 | 4.65 | 0.0001** | 1.242574 | 1.13381 | 1.361772 |
| Educleve |  |  |  |  |  |  |  |
| 2 | 1.574473 | 0.7642837 | 2.06 | 0.039* | 4.828195 | 1.079507 | 21.59456 |
| 3 | 1.524919 | 0.710386 | 2.15 | 0.032* | 4.594769 | 1.141779 | 18.49036 |
| Distance | -0.0979082 | 0.0595689 | -1.64 | 0.100ns | 0.906732 | 0.806815 | 1.019023 |
| Distancb | -0.2450777 | 0.0629562 | -3.89 | 0.0001** | 0.782644 | 0.691792 | 0.885427 |
| Agroecol |  |  |  |  |  |  |  |
| 1 | 1.453768 | 0.607266 | 2.39 | 0.017* | 4.279208 | 1.30154 | 14.06919 |
| 2 | 1.641543 | 0.6771989 | 2.42 | 0.015* | 5.163132 | 1.369243 | 19.4691 |
| Tlu | 0.2942809 | 0.0992246 | 2.97 | 0.003** | 1.342161 | 1.104954 | 1.630289 |
| Sizeoffa | 0.2825286 | 0.2552447 | 1.11 | 0.268ns | 1.32648 | 0.804333 | 2.187587 |
| 1.ownershi | 0.0862201 | 0.0412494 | 2.09 | 0.057ns | 0.9173923 | 0.846426 | 1.006416 |
| Gradeoff |  |  |  |  |  |  |  |
| 2 | -3.00864 | 1.522668 | -1.98 | 0.048* | 0.049359 | 0.002496 | 0.976027 |
| 3 | -1.979841 | 1.489536 | -1.33 | 0.184ns | 0.138091 | 0.007452 | 2.558946 |
| distanc1 | -0.4757073 | 0.1688186 | -2.82 | 0.005** | 0.621445 | 0.44638 | 0.86517 |
| 1.extensio | 1.176131 | 0.510125 | 2.31 | 0.021* | 3.241808 | 1.192801 | 8.81062 |
| 1.farmerto | -1.627809 | 0.9382929 | -1.73 | 0.083ns | 0.196359 | 0.031216 | 1.235173 |
| 1.credit | 0.231757 | 0.07186 | 3.23 | 0.001** | 1.260814 | 1.095174 | 1.451505 |
| 1.irrigati | -0.532708 | 0.9843554 | -0.54 | 0.588ns | 0.587013 | 0.085264 | 4.041408 |
| 1.rainexp | 2.471425 | 0.901729 | 2.74 | 0.006** | 5.095654 | 1.015017 | 16.60930 |
| 1.tempera0 | 1.545724 | 0.5176167 | 2.99 | 0.003** | 4.691367 | 1.700996 | 12.93885 |
| _cons | 0.0318 | 0.198356 | 0.16 | 0.873ns | 1.032311 | 0.699794 | 1.522829 |
| no_adapt |  |  |  |  |  |  |  |

(** means significant at 1% level of significance, * means significant at 5% level of significance and ns means not significant at 5% level of significance)

Appendix 1 Table 4. Result of Poisson regression using STATA 12(for UDV)

| UDV | Β | Std. Err. | z | P>z | Exp(β) | [95% Conf. Interval] of Exp(β) | |
| --- | --- | --- | --- | --- | --- | --- | --- |
| 1.Sex | -0.0228 | 0.046338 | -0.49 | 0.623ns | 0.977462 | 0.8926 | 1.070391 |
| Age | 0.016117 | 0.001762 | 9.15 | 0.0001** | 1.016248 | 1.012744 | 1.019764 |
| sourcein |  |  |  |  |  |  |  |
| 1 | 0.231307 | 0.053649 | 4.31 | 0.0001** | 1.260246 | 1.134461 | 1.399977 |
| 2 | 0.197492 | 0.054383 | 3.63 | 0.0001** | 1.218343 | 1.095163 | 1.355377 |
| hhsize | 0.0431796 | 0.0148223 | 2.91 | 0.004** | 1.044125 | 1.014229 | 1.074903 |
| Educleve |  |  |  |  |  |  |  |
| 2 | 0.076219 | 0.058246 | 1.31 | 0.191ns | 1.079198 | 0.96277 | 1.209707 |
| 3 | -0.06323 | 0.065657 | -0.96 | 0.336ns | 0.938728 | 0.825377 | 1.067645 |
| distance | -0.01362 | 0.003375 | -4.04 | 0.0001** | 0.98647 | 0.979967 | 0.993016 |
| distancb | -0.01259 | 0.004083 | -3.08 | 0.002** | 0.987494 | 0.979624 | 0.995427 |
| Agroecol |  |  |  |  |  |  |  |
| 1 | 0.3267516 | 0.0648028 | 5.04 | 0.0001** | 1.386457 | 1.221086 | 1.574224 |
| 2 | 0.3049368 | 0.0644614 | 4.73 | 0.0001** | 1.356539 | 1.195536 | 1.539225 |
| tlu | 0.019467 | 0.005852 | 3.33 | 0.001** | 1.019658 | 1.00803 | 1.03142 |
| sizeoffa | 0.0353715 | 0.0104168 | 3.4 | 0.001** | 1.036005 | 1.015067 | 1.057374 |
| 1.ownershi | -0.08483 | 0.055537 | -1.53 | 0.127ns | 0.918665 | 0.823918 | 1.024308 |
| gradeoff |  |  |  |  |  |  |  |
| 2 | -0.1274455 | 0.0505598 | -2.52 | 0.012* | 0.8803414 | 0.797287 | 0.972048 |
| 3 | -0.2360206 | 0.0533839 | -4.42 | 0.0001** | 0.7897644 | 0.711307 | 0.876876 |
| distanc1 | -0.0193987 | 0.0076037 | -2.55 | 0.011* | 0.9807883 | 0.96628 | 0.995514 |
| 1.extensio | 0.1636058 | 0.0523993 | 3.12 | 0.002** | 1.17775 | 1.062798 | 1.305135 |
| 1.farmerto | 0.217185 | 0.0467363 | 4.65 | 0.0001** | 1.242574 | 1.13381 | 1.361772 |
| 1.credit | -0.1073107 | 0.0411485 | -2.61 | 0.009** | 0.8982465 | 0.828648 | 0.973691 |
| 1.irrigati | -0.0352075 | 0.0453018 | -0.78 | 0.437ns | 0.9654051 | 0.883382 | 1.055044 |
| 1.rainexp | 0.2474 | 0.040314 | 6.14 | 0.0001** | 1.375147 | 1.322388 | 1.43001 |
| 1.tempera0 | 0.1800772 | 0.0462331 | 3.89 | 0.0001** | 1.19731 | 1.093586 | 1.310872 |
| _cons | 0.9681714 | 0.1657189 | 5.84 | 0.0001** | 2.633125 | 1.90288 | 3.643608 |
| ln(hhsize) | 1 (exposure) | | | | | | |

(** means significant at 1% level of significance, * means significant at 5% level of significance and ns means not significant at 5% level of significance)

Appendix 1 Table 5. Result of negative binomial regression using STATA 12(CPD)

| CPD | Β | Std. Err. | z | P>z | Exp(β) | [95% Conf. Interval] of Exp(β) | |
| --- | --- | --- | --- | --- | --- | --- | --- |
| 1.Sex | 0.0278325 | 0.0427069 | 0.65 | 0.515ns | 1.028223 | 0.9456607 | 1.117994 |
| Age | 0.0050954 | 0.0015144 | 3.36 | 0.001** | 1.005108 | 1.00213 | 1.008096 |
| sourcein |  |  |  |  |  |  |  |
| 1 | 0.1609376 | 0.0505408 | 3.18 | 0.001** | 1.174612 | 1.063834 | 1.296925 |
| 2 | 0.1542052 | 0.0526532 | 2.93 | 0.003** | 1.16673 | 1.05233 | 1.293567 |
| hhsize | 0.0007697 | 0.0140849 | 0.05 | 0.956ns | 1.00077 | 0.9735207 | 1.028782 |
| Educleve |  |  |  |  |  |  |  |
| 2 | 0.0660356 | 0.0574731 | 1.15 | 0.251ns | 1.068265 | 0.95446 | 1.195639 |
| 3 | 0.0182067 | 0.0629441 | 0.29 | 0.772ns | 1.018373 | 0.9001791 | 1.152087 |
| distance | -0.01531 | 0.003162 | -4.84 | 0.0001** | 0.98481 | .9787265 | .9909317 |
| distancb | -0.0098866 | 0.0026806 | -3.69 | 0.0001** | 0.9901621 | 0.9849737 | 0.9953779 |
| Agroecol |  |  |  |  |  |  |  |
| 1 | 0.22683 | 0.061751 | 3.67 | 0.0001** | 1.254617 | 1.111601 | 1.416032 |
| 2 | 0.220311 | 0.065033 | 3.39 | 0.001** | 1.246464 | 1.097296 | 1.41591 |
| tlu | 0.38516 | 0.058154 | 6.62 | 0.0001** | 1.469849 | 1.311511 | 1.647304 |
| sizeoffa | 0.0342165 | 0.0098677 | 3.47 | 0.001** | 1.034809 | 1.014987 | 1.055017 |
| 1.ownershi | 0.0862201 | 0.0412494 | 2.09 | 0.057ns | 0.9173923 | 0.8461426 | 1.006416 |
| gradeoff |  |  |  |  |  |  |  |
| 2 | -0.180061 | 0.0486892 | -3.7 | 0.0001** | 0.8352193 | 0.7592 | 0.9188504 |
| 3 | -0.1605916 | 0.0498546 | -3.22 | 0.001** | 0.8516398 | 0.7723597 | 0.9390578 |
| distanc1 | 0.013985 | 0.0070504 | 1.98 | 0.047* | 1.014083 | 1.000167 | 1.028194 |
| 1.extensio | 0.2361602 | 0.0502227 | 4.7 | 0.0001** | 1.266377 | 1.147661 | 1.397374 |
| 1.farmerto | 0.0984275 | 0.0441402 | 2.23 | 0.026* | 1.103434 | 1.011986 | 1.203147 |
| 1.credit | 0.0790117 | 0.0395836 | 2 | 0.046* | 1.082217 | 1.00143 | 1.169521 |
| 1.irrigati | -0.0571889 | 0.0458595 | -1.25 | 0.212ns | 0.9444157 | 0.863232 | 1.033234 |
| 1.rainexp | 0.163658 | 0.038464 | 4.25 | 0.0001** | 1.177811 | 1.092283 | 1.270036 |
| 1.tempera0 | 0.1174372 | 0.0437758 | 2.68 | 0.007** | 1.124611 | 1.032144 | 1.225362 |
| _cons | 0.9978923 | 0.1589922 | 6.28 | 0.0001** | 2.712559 | 1.986299 | 3.704363 |
| ln(hhsize) | 1 (exposure) | | | | | | |

(** means significant at 1% level of significance, * means significant at 5% level of significance and ns means not significant at 5% level of significance)

Appendix 1 Table 6. Result of Poisson regression using STATA 12(PT)

| PT | β | Std. Err. | z | P>z | Exp(β) | [95% Conf. Interval] of Exp(β) | |
| --- | --- | --- | --- | --- | --- | --- | --- |
| 1.Sex | -0.006123 | 0.0461796 | -0.13 | 0.895ns | 0.993896 | 0.907889 | 1.08805 |
| Age | -0.00405 | 0.0015096 | -2.68 | 0.007** | 0.995958 | 0.993016 | 0.99891 |
| sourcein |  |  |  |  |  |  |  |
| 1 | 0.299826 | 0.06084 | 4.93 | 0.0001** | 1.349624 | 1.197915 | 1.520546 |
| 2 | 0.241878 | 0.064521 | 3.75 | 0.0001** | 1.273638 | 1.122343 | 1.445329 |
| hhsize | 0.0749715 | 0.0140969 | 5.32 | 0.0001** | 1.077853 | 1.048481 | 1.108049 |
| Educleve |  |  |  |  |  |  |  |
| 2 | 0.1922042 | 0.0535263 | 3.59 | 0.0001** | 1.211918 | 1.091218 | 1.345969 |
| 3 | 0.1175396 | 0.0601023 | 1.96 | 0.051ns | 1.124726 | 0.999741 | 1.265336 |
| distance | -0.002619 | 0.0026448 | -0.99 | 0.322ns | 0.997384 | 0.992228 | 1.002568 |
| distancb | -0.000645 | 0.0026567 | -0.24 | 0.808ns | 0.999355 | 0.994165 | 1.004573 |
| Agroecol |  |  |  |  |  |  |  |
| 1 | 0.1384798 | 0.0596504 | 2.32 | 0.020* | 1.148526 | 1.021801 | 1.290968 |
| 2 | 0.1602116 | 0.0582116 | 2.75 | 0.006** | 1.173759 | 1.047199 | 1.315615 |
| tlu | 0.015193 | 0.005578 | 2.72 | 0.006** | 1.015309 | 1.015309 | 1.004269 |
| sizeoffa | 0.0439581 | 0.0099828 | 4.4 | 0.0001** | 1.044939 | 1.024692 | 1.065585 |
| 1.ownershi | -0.02936 | 0.055157 | -0.53 | 0.595ns | 0.971704 | 0.871568 | 1.081932 |
| gradeoff |  |  |  |  |  |  |  |
| 2 | -0.158668 | 0.0486821 | -3.26 | 0.001** | 0.85328 | 0.775628 | 0.938706 |
| 3 | -0.104538 | 0.0488872 | -2.14 | 0.032* | 0.90074 | 0.81844 | 0.991317 |
| distanc1 | 0.0211392 | 0.0069418 | 3.05 | 0.002** | 1.021364 | 1.007562 | 1.035356 |
| 1.extensio | 0.1043848 | 0.0485316 | 2.15 | 0.031* | 1.110028 | 1.009308 | 1.220798 |
| 1.farmerto | 0.2118918 | 0.0449242 | 4.72 | 0.0001** | 1.236014 | 1.131837 | 1.34978 |
| 1.credit | 0.0532533 | 0.0393149 | 1.35 | 0.176ns | 1.054697 | 0.976479 | 1.13918 |
| 1.irrigati | 0.0527983 | 0.0420401 | 1.26 | 0.209ns | 1.054217 | 0.970835 | 1.14476 |
| 1.rainexp | 0.128852 | 0.0392289 | 3.28 | 0.001** | 2.825405 | 1.053339 | 1.228433 |
| 1.tempera0 | 0.156838 | 0.038214 | 4.1 | 0.0001** | 1.169806 | 1.085391 | 1.260786 |
| _cons | 1.038652 | 0.1582768 | 6.56 | 0.0001** | 2.825405 | 2.071835 | 3.853064 |
| ln(hhsize) | 1 (exposure) | | | | | | |

(** means significant at 1% level of significance, * means significant at 5% level of significance and ns means not significant at 5% level of significance)

Appendix 1 Table 7. Result of negative binomial regression using STATA 12(SWC)

| SWC | Β | Std. Err. | z | P>z | Exp(β) | [95% Conf. Interval] of Exp(β) | |
| --- | --- | --- | --- | --- | --- | --- | --- |
| 1.Sex | 0.000181 | 0.057566 | 0.00 | 0.997ns | 1.000181 | 0.893466 | 1.119642 |
| Age | -0.00594 | 0.001852 | -3.20 | 0.001** | 0.994083 | 0.990481 | 0.997697 |
| sourcein |  |  |  |  |  |  |  |
| 1 | 0.302907 | 0.060885 | 4.98 | 0.0001** | 1.353789 | 1.201506 | 1.525373 |
| 2 | 0.280355 | 0.063957 | 4.38 | 0.0001** | 1.3236 | 1.167661 | 1.500364 |
| hhsize | 0.016597 | 0.017743 | 0.94 | 0.350ns | 1.016735 | 0.981986 | 1.052714 |
| Educleve |  |  |  |  |  |  |  |
| 2 | 0.482672 | 0.062811 | 7.68 | 0.0001** | 1.620399 | 1.432707 | 1.832679 |
| 3 | 0.285879 | 0.071761 | 3.98 | 0.0001** | 1.330932 | 1.156305 | 1.53193 |
| distance | 0.000904 | 0.003272 | 0.28 | 0.782ns | 1.000905 | 0.994507 | 1.007344 |
| distancb | -0.00212 | 0.003284 | -0.65 | 0.519ns | 0.997883 | 0.991482 | 1.004326 |
| Agroecol |  |  |  |  |  |  |  |
| 1 | 0.419767 | 0.165009 | 2.54 | 0.011* | 1.521607 | 1.101151 | 2.102607 |
| 2 | 0.456496 | 0.177236 | 2.58 | 0.01* | 1.578534 | 1.115297 | 2.234176 |
| tlu | 0.014058 | 0.00598 | 2.35 | 0.019* | 1.014157 | 1.002341 | 1.026114 |
| sizeoffa | 0.061496 | 0.012052 | 5.10 | 0.0001** | 1.063426 | 1.038602 | 1.088843 |
| 1.ownershi | -0.0389 | 0.0502 | -0.77 | 0.438ns | 0.961843 | 0.871714 | 1.061292 |
| gradeoff |  |  |  |  |  |  |  |
| 2 | 0.061547 | 0.059379 | 1.04 | 0.300ns | 1.063481 | 0.946643 | 1.194739 |
| 3 | -0.03024 | 0.062124 | -0.49 | 0.626ns | 0.97021 | 0.858985 | 1.095837 |
| distanc1 | 0.038356 | 0.008359 | 4.59 | 0.0001** | 1.039101 | 1.022217 | 1.056264 |
| 1.extensio | 0.395041 | 0.063359 | 6.23 | 0.0001** | 1.484445 | 1.311091 | 1.680719 |
| 1.farmerto | 0.332434 | 0.072489 | 4.59 | 0.0001** | 1.394358 | 1.209683 | 1.607226 |
| 1.credit | -0.03637 | 0.048621 | -0.75 | 0.454ns | 0.964284 | 0.876635 | 1.060697 |
| 1.irrigati | 0.064689 | 0.05195 | 1.25 | 0.213ns | 1.066827 | 0.963549 | 1.181175 |
| 1.rainexp | 0.474495 | 0.06325 | 7.50 | 0.0001** | 1.607203 | 1.419816 | 1.819322 |
| 1.tempera0 | 0.27826 | 0.055518 | 5.01 | 0.0001** | 1.320829 | 1.184649 | 1.472664 |
| _cons | 0.0318 | 0.198356 | 0.16 | 0.873ns | 1.032311 | 0.699794 | 1.522829 |
| ln(hhsize) | 1 (exposure) | | | | | | |

(** means significant at 1% level of significance, * means significant at 5% level of significance and ns means not significant at 5% level of significance)
